# Supplementary material for: Long-Term Effects on QT Prolongation of Pretomanid Alone and in Combinations in Patients with Tuberculosis
Source: PubMed Central journal article supplement (PMC6761551; doi:10.1128/aac.00445-19), 2019-09-23
Supplement: AAC.00445-19-s0001.pdf [file AAC.00445-19-s0001.pdf]

## SUPPLEMENTARY MATERIAL

**Table S1. Overview of ECG data and baseline characteristics by study**

| Study  | N subject | N ECG (post-dose with PK) | QTcF baseline (ms)        | Heart rate baseline (bpm) | Age (yr)        | Weight (kg)             | Sex (F/M) | Race (A/B/M/N/O/W) | TB type (DS/MDR/XDR) |
|--------|-----------|---------------------------|---------------------------|---------------------------|-----------------|-------------------------|-----------|--------------------|----------------------|
| CL-007 | 61        | 826                       | 392.2<br>(346.7 to 428.8) | 88.5<br>(58.7 to 124.3)   | 30 (18 to 56)   | 53<br>(39 to 72.5)      | 61/0      | 0/32/29/0/0/0      | 61/0/0               |
| CL-010 | 61        | 595                       | 384<br>(348.5 to 426.8)   | 90.3<br>(49.5 to 133.5)   | 26 (18 to 55)   | 52<br>(40 to 73)        | 61/0      | 0/24/37/0/0/0      | 61/0/0               |
| NC-001 | 75        | 741                       | 395<br>(359.2 to 433)     | 84.3<br>(55 to 114)       | 27 (19 to 53)   | 53.8<br>(41.4 to 79.4)  | 18/57     | 0/29/46/0/0/0      | 75/0/0               |
| NC-002 | 139       | 949                       | 385.5<br>(337.5 to 427.5) | 90<br>(54.5 to 134.5)     | 27 (18 to 65)   | 55<br>(40 to 90.6)      | 49/90     | 0/97/41/0/1/0      | 116/23/0             |
| NC-003 | 30        | 416                       | 387.6<br>(345.2 to 417.8) | 92.4<br>(59.9 to 117.3)   | 29.5 (19 to 62) | 49.4<br>(40.4 to 68.1)  | 21-Sep    | 1/13/0/0/15/1      | 30/0/0               |
| NC-005 | 166       | 584                       | 388.8<br>(317 to 446)     | 88.5<br>(51.3 to 158.7)   | 32 (18 to 69)   | 53<br>(35 to 99.8)      | 40/126    | 0/138/26/1/0/1     | 111/55/0             |
| NC-006 | 214       | 400                       | 392.5<br>(348.5 to 460.5) | 88<br>(54.5 to 138)       | 35.5 (18 to 77) | 52.2<br>(31.8 to 137.2) | 66/148    | 15/146/31/0/12/10  | 202/12/0             |
| Nix-TB | 84        | 141                       | 415.2<br>(368.5 to 469)   | 84.2<br>(50 to 131.5)     | 33.5 (18 to 60) | 54.5<br>(30 to 108)     | 41/43     | 0/64/0/0/19/1      | 0/33/51              |
| Total  | 830       | 4652                      | 391.5<br>(317 to 469)     | 88.5<br>(49.5 to 158.7)   | 31 (18 to 77)   | 53<br>(30 to 137.2)     | 345/485   | 16/543/210/1/47/13 | 656/123/51           |

Race: A-Asian, B-black, M-mixed, N-native Hawaiian or Pacific islander, O-other and W-white. Continuous variables are report as median(range).

**Table S2. Summary of analysis dataset by treatment**

| Drugs          | N trial | N Arm | N Subj. | N QT obs | Dose Pretomanid (mg)               | Dose Bedaquiline (mg) | Dose Moxifloxacin (mg) | Dose Pyrazinamide (mg)* | Dose Linezolid (mg/day) | Base QTcF (ms)            | ΔQTcF (ms)              |
|----------------|---------|-------|---------|----------|------------------------------------|-----------------------|------------------------|-------------------------|-------------------------|---------------------------|-------------------------|
| pa             | 2       | 8     | 122     | 1421     | 50/100/150/<br>200/600/1000/1200   | 0                     | 0                      | 0                       | 0                       | 387.7 (346.7<br>to 428.8) | 7.3 (-79.5<br>to 81)    |
| bed            | 1       | 1     | 15      | 100      | 0                                  | 700                   | 0                      | 0                       | 0                       | 389 (365 to<br>425.5)     | 5.5 (-19 to<br>50)      |
| pyr            | 1       | 1     | 15      | 209      | 0                                  | 0                     | 0                      | 1500                    | 0                       | 389.6 (345.2<br>to 417.8) | -2.3 (-40.3<br>to 48.6) |
| pa+bed         | 1       | 1     | 15      | 28       | 200                                | 700                   | 0                      | 0                       | 0                       | 400.5 (364.5<br>to 426.5) | 18.8 (1.5 to<br>45)     |
| pa+pyr         | 1       | 1     | 15      | 258      | 200                                | 0                     | 0                      | 1500                    | 0                       | 390 (365.4<br>to 419)     | 8 (-30.3 to<br>49.3)    |
| bed+pyr        | 1       | 1     | 15      | 102      | 0                                  | 700                   | 0                      | 1500                    | 0                       | 399.5 (367<br>to 433)     | 9 (-34.5 to<br>36.5)    |
| pa+mox+pyr     | 3       | 8     | 368     | 1602     | 100/200                            | 0                     | 400                    | 1500                    | 0                       | 387 (337.5<br>to 460.5)   | 13.8 (-38 to<br>81.5)   |
| pa+bed+pyr     | 2       | 3     | 126     | 591      | 200                                | 200/400               | 0                      | 1500                    | 0                       | 387.3 (317<br>to 446)     | 17.1 (-31.3<br>to 125)  |
| pa+bed+lin     | 1       | 1     | 84      | 141      | 200                                | 200                   | 0                      | 0                       | 600                     | 418 (368.5<br>to 469)     | 6 (-45 to<br>44.5)      |
| pa+mox+bed+pyr | 1       | 1     | 55      | 200      | 200                                | 200                   | 400                    | 1500                    | 0                       | 392.3 (333.7<br>to 431.3) | 18.5 (-13.3<br>to 86.7) |
| Total          | 8       | 26    | 830     | 4652     | 0/50/100/150/<br>200/600/1000/1200 | 0/200/400/700         | 0/400                  | 0/1500                  | 0/600                   | 389 (317 to<br>469)       | 11 (-79.5 to<br>125)    |

Pa- Pretomanid (PA-824), bed-bedaquiline, mox-moxifloxacin, pyr- pyrazinamide, Lin – Linezolid. \*some trials were dosed by weight. ®As 600 mg BID or

1200 mg QD; dose adjustments for toxicity were frequent. QTc variables are reported as median(range).

**Figure S1. Intercept terms versus change of heart rate**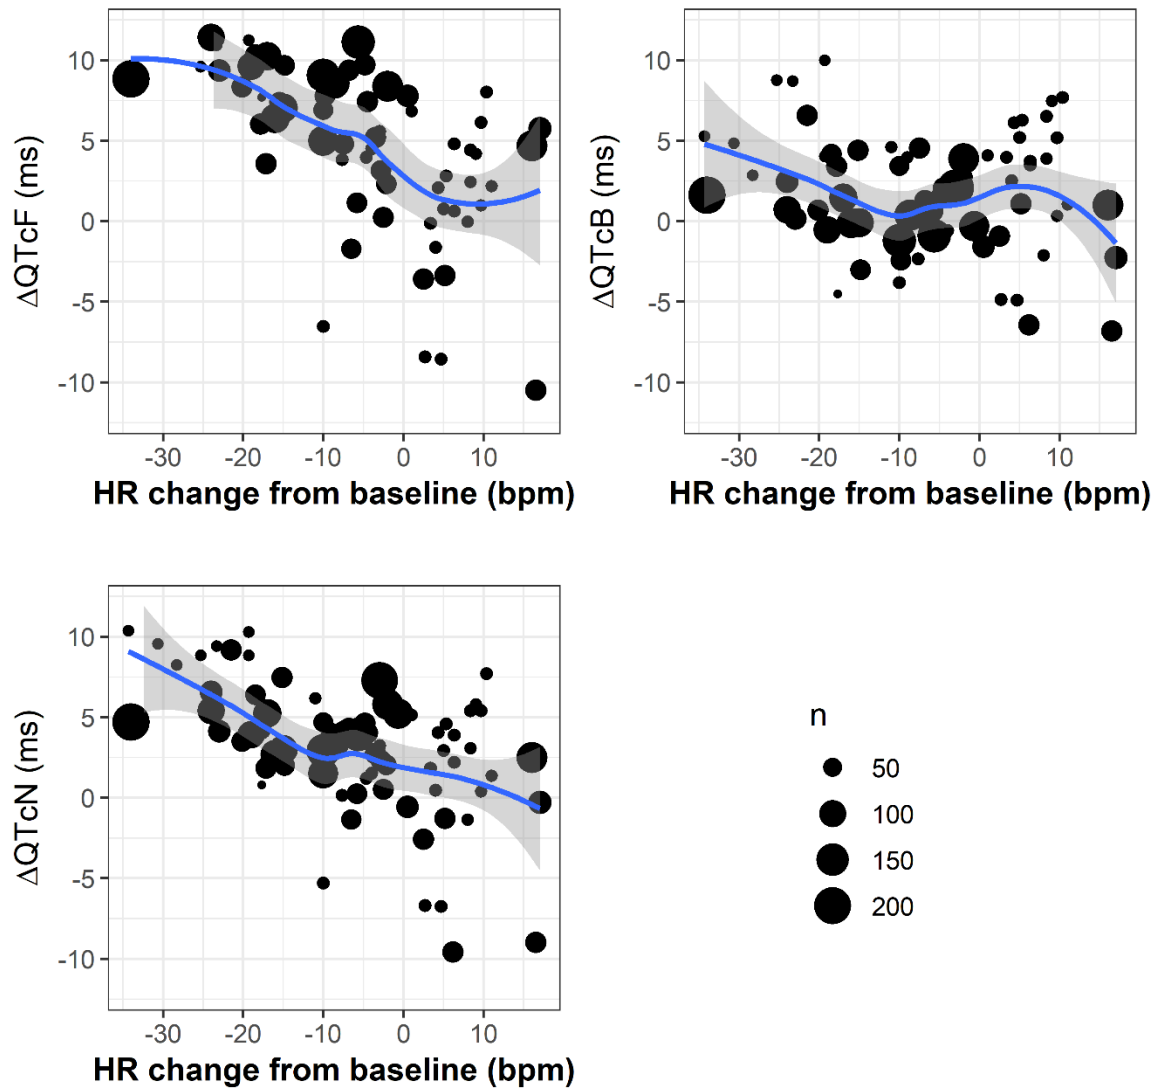

Dots are intercept terms estimated for each trial, visit and timepoint. The blue line is a statistical smooth of the data, the gray area represents confidence intervals of the smooth.
